# Supplementary material for: Gene Expression Profiling of Shoot-Derived Calli from Adult Radiata Pine and Zygotic Embryo-Derived Embryonal Masses
Source: PubMed Central journal article supplement (PMC4454686; doi:10.1371/journal.pone.0128679), 2015-06-03

## Pairwise 1-way ANOVA with post-hoc Tukey HDS of embryonal masses

[Link to Tukey calculator](#)

**Figure 3**  
**YLS8**

| Tukey HSD results |                       |                   |                     |
|-------------------|-----------------------|-------------------|---------------------|
| treatments pair   | Tukey HSD Q statistic | Tukey HSD p-value | Tukey HSD inference |
| A vs B            | 2.4408                | 0.2710714         | insignificant       |
| A vs C            | 2.6036                | 0.2351091         | insignificant       |
| B vs C            | 0.1628                | 0.8999947         | insignificant       |

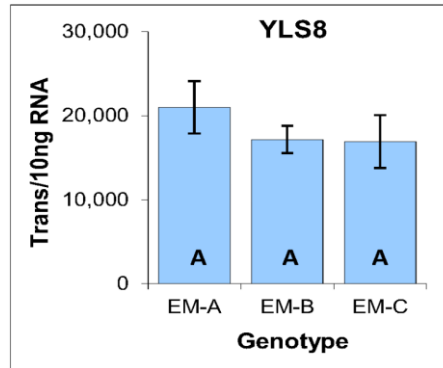

**Figure 4**  
**H4**

| Tukey HSD results |                       |                   |                     |
|-------------------|-----------------------|-------------------|---------------------|
| treatments pair   | Tukey HSD Q statistic | Tukey HSD p-value | Tukey HSD inference |
| A vs B            | 2.1258                | 0.3542583         | insignificant       |
| A vs C            | 5.8322                | 0.0145336         | * p<0.05            |
| B vs C            | 3.7063                | 0.0872086         | insignificant       |

**PCNA**

| treatments pair | Tukey HSD Q statistic | Tukey HSD p-value | Tukey HSD inference |
|-----------------|-----------------------|-------------------|---------------------|
| A vs B          | 2.3312                | 0.2978950         | insignificant       |
| A vs C          | 1.0705                | 0.7294097         | insignificant       |
| B vs C          | 1.2607                | 0.6585455         | insignificant       |

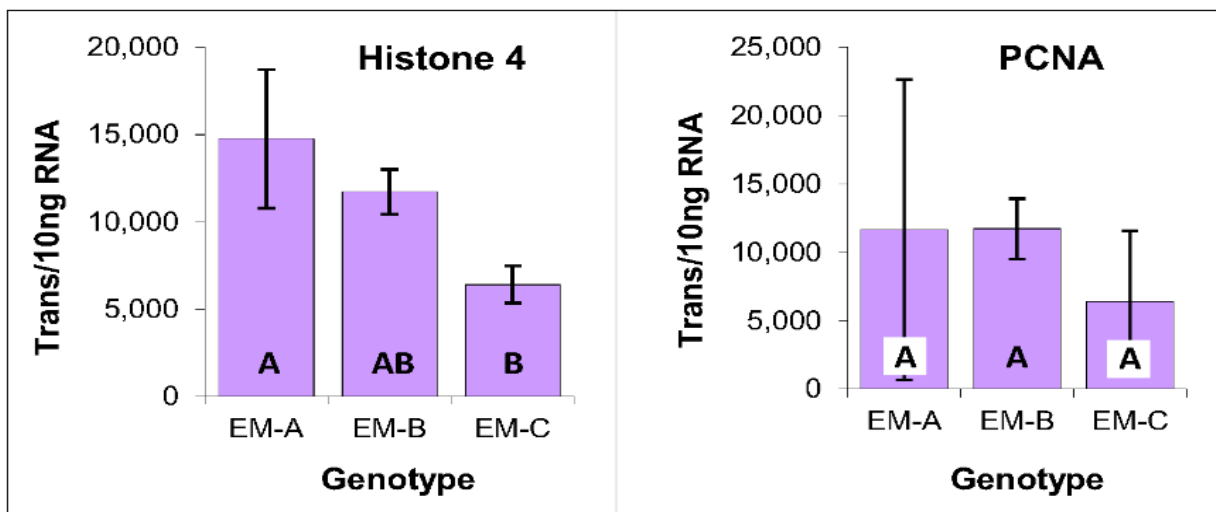

**Figure 5**

**LEC1**

| treatments pair | Tukey HSD Q statistic | Tukey HSD p-value | Tukey HSD inference |
|-----------------|-----------------------|-------------------|---------------------|
| A vs B          | 2.3312                | 0.2978950         | insignificant       |
| A vs C          | 1.0705                | 0.7294097         | insignificant       |
| B vs C          | 1.2607                | 0.6585455         | insignificant       |

**WOX2**

| treatments pair | Tukey HSD Q statistic | Tukey HSD p-value | Tukey HSD inference |
|-----------------|-----------------------|-------------------|---------------------|
| A vs B          | 0.6624                | 0.8814935         | insignificant       |
| A vs C          | 0.3303                | 0.8999947         | insignificant       |
| B vs C          | 0.3321                | 0.8999947         | insignificant       |

**ABI3**

| treatments pair | Tukey HSD Q statistic | Tukey HSD p-value | Tukey HSD inference |
|-----------------|-----------------------|-------------------|---------------------|
| A vs B          | 3.7329                | 0.0851491         | insignificant       |
| A vs C          | 0.9991                | 0.7560265         | insignificant       |
| B vs C          | 2.7338                | 0.2094958         | insignificant       |

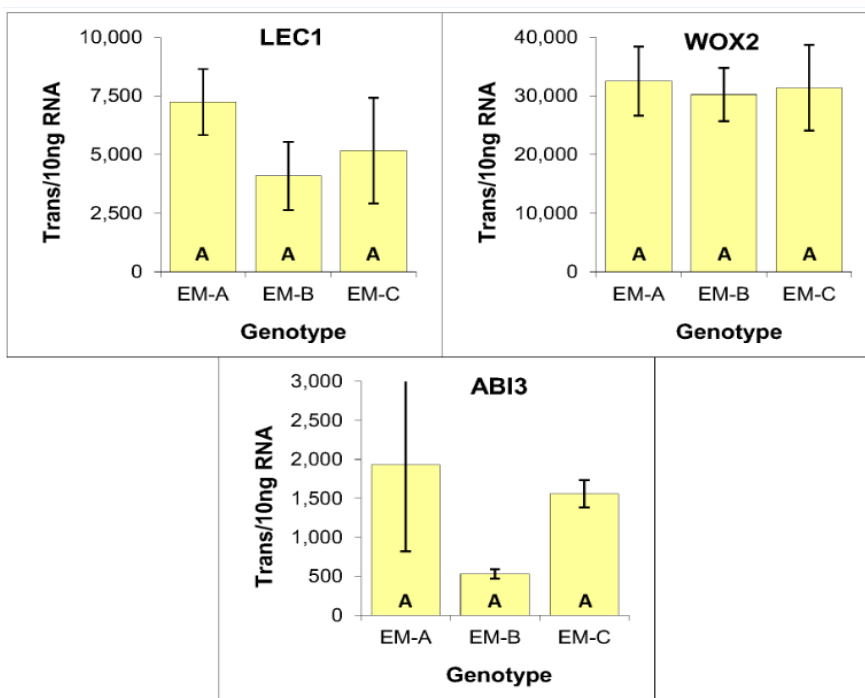

**Figure 6**  
**SKN1**

**SKN2**

| treatments pair | Tukey HSD Q statistic | Tukey HSD p-value | Tukey HSD inference | treatments pair | Tukey HSD Q statistic | Tukey HSD p-value | Tukey HSD inference |
|-----------------|-----------------------|-------------------|---------------------|-----------------|-----------------------|-------------------|---------------------|
| A vs B          | 2.1476                | 0.3478685         | insignificant       | A vs B          | 2.6058                | 0.2346443         | insignificant       |
| A vs C          | 2.6258                | 0.2305447         | insignificant       | A vs C          | 1.0422                | 0.7399897         | insignificant       |
| B vs C          | 0.4782                | 0.8999947         | insignificant       | B vs C          | 1.5637                | 0.5456404         | insignificant       |

**SKN3**

**SKN4**

| treatments pair | Tukey HSD Q statistic | Tukey HSD p-value | Tukey HSD inference | treatments pair | Tukey HSD Q statistic | Tukey HSD p-value | Tukey HSD inference |
|-----------------|-----------------------|-------------------|---------------------|-----------------|-----------------------|-------------------|---------------------|
| A vs B          | 0.4983                | 0.8999947         | insignificant       | A vs B          | 1.6767                | 0.5035147         | insignificant       |
| A vs C          | 0.7973                | 0.8312185         | insignificant       | A vs C          | 1.5975                | 0.5330355         | insignificant       |
| B vs C          | 0.2990                | 0.8999947         | insignificant       | B vs C          | 0.0792                | 0.8999947         | insignificant       |

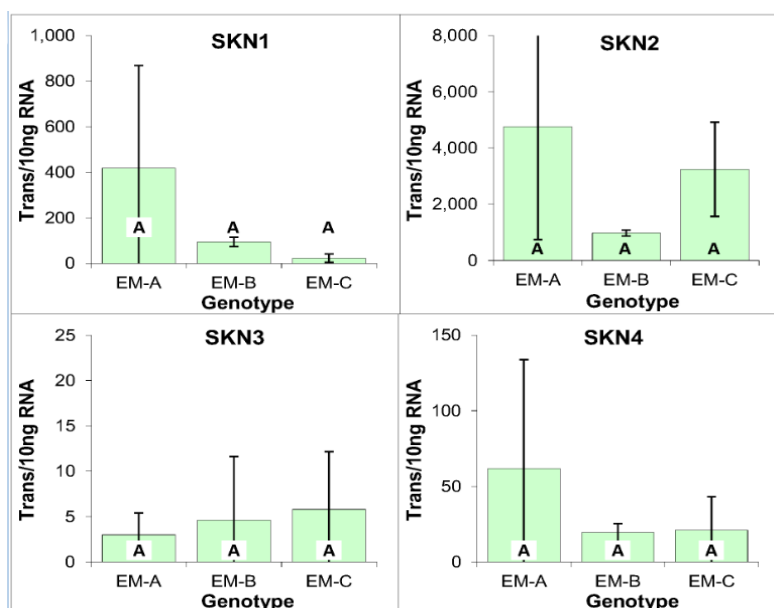

**Figure 7**  
**WOX4**

| treatments pair | Tukey HSD Q statistic | Tukey HSD p-value | Tukey HSD inference |
|-----------------|-----------------------|-------------------|---------------------|
| A vs B          | 0.4075                | 0.8999947         | insignificant       |
| A vs C          | 3.2599                | 0.1304697         | insignificant       |
| B vs C          | 3.6674                | 0.0903066         | insignificant       |

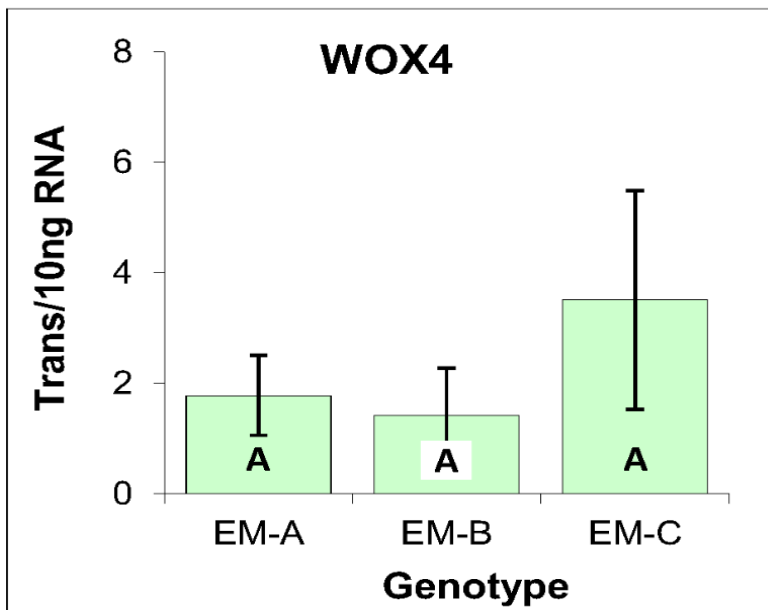

Supplement: pone.0128679.s001.pdf [file pone.0128679.s001.pdf]
