# Supplementary material for: Gene Expression Profiling of Shoot-Derived Calli from Adult Radiata Pine and Zygotic Embryo-Derived Embryonal Masses
Source: PubMed Central journal article supplement (PMC4454686; doi:10.1371/journal.pone.0128679), 2015-06-03

## Excel 2-way ANOVA without replicates of shoot-derived tissues

### YLS8

| Source of Variation | SS       | df | MS      | F        | P-value  | F crit   |
|---------------------|----------|----|---------|----------|----------|----------|
| Rows                | 16008773 | 3  | 5336258 | 1.929692 | 0.178659 | 3.490295 |
| Columns             | 20260036 | 4  | 5065009 | 1.831603 | 0.187641 | 3.259167 |
| Error               | 33184105 | 12 | 2765342 |          |          |          |
| Total               | 69452915 | 19 |         |          |          |          |

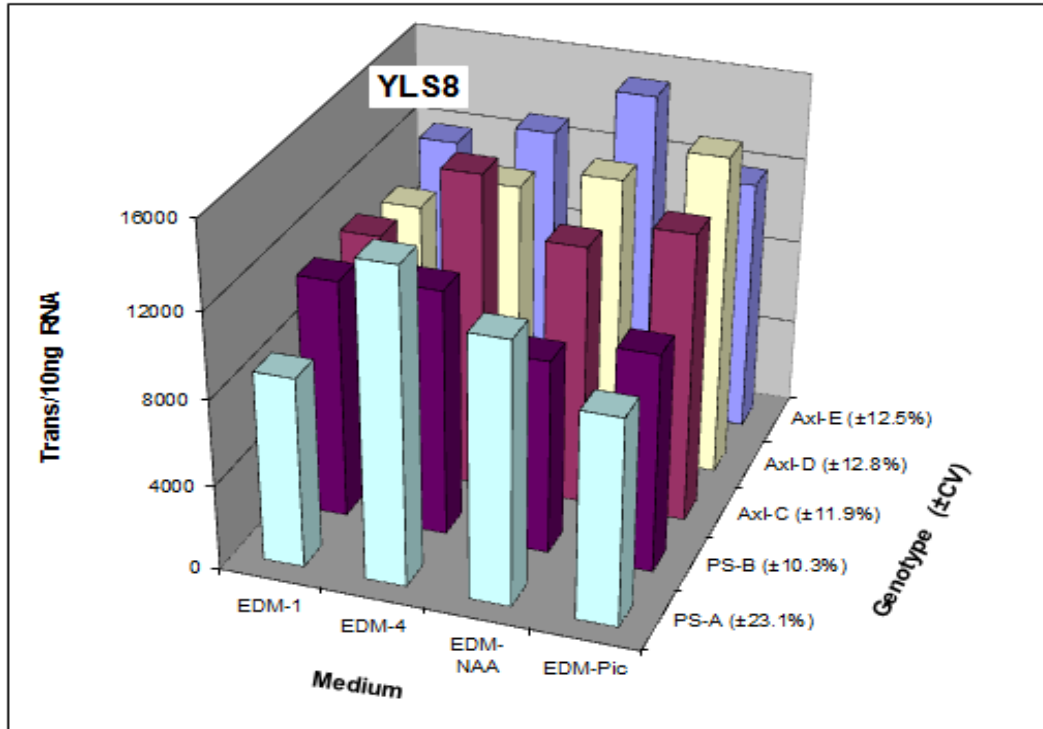

## Histone 4

| Source of Variation | SS       | df | MS       | F        | P-value  | F crit   |
|---------------------|----------|----|----------|----------|----------|----------|
| Rows                | 14684758 | 3  | 4894919  | 5.058283 | 0.017126 | 3.490295 |
| Columns             | 66525697 | 4  | 16631424 | 17.18648 | 6.58E-05 | 3.259167 |
| Error               | 11612444 | 12 | 967703.7 |          |          |          |
| Total               | 92822899 | 19 |          |          |          |          |

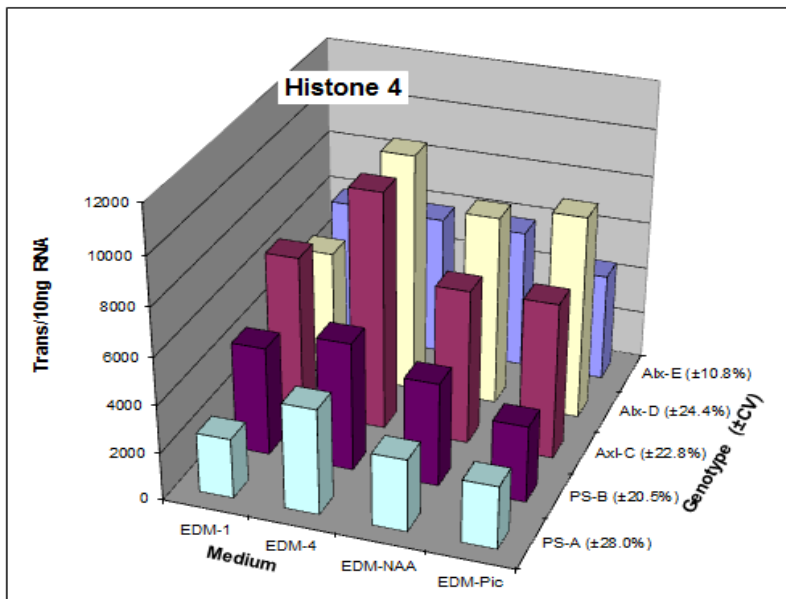

## PCNA

| Source of Variation | SS       | df | MS       | F        | P-value  | F crit   |
|---------------------|----------|----|----------|----------|----------|----------|
| Rows                | 1.04E+08 | 3  | 34653646 | 3.343437 | 0.055823 | 3.490295 |
| Columns             | 1.78E+09 | 4  | 4.45E+08 | 42.89414 | 5.16E-07 | 3.259167 |
| Error               | 1.24E+08 | 12 | 10364677 |          |          |          |
| Total               | 2.01E+09 | 19 |          |          |          |          |

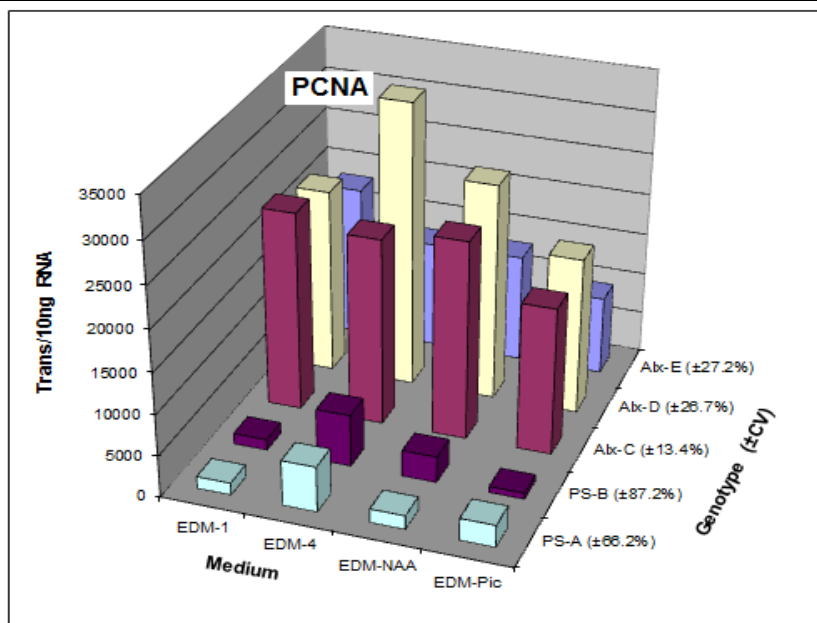

## LEC1

| Source of Variation | SS       | df | MS       | F        | P-value  | F crit   |
|---------------------|----------|----|----------|----------|----------|----------|
| Rows                | 11357097 | 3  | 3785699  | 4.805206 | 0.114894 | 9.276628 |
| Columns             | 2406641  | 1  | 2406641  | 3.054761 | 0.178824 | 10.12796 |
| Error               | 2363498  | 3  | 787832.8 |          |          |          |

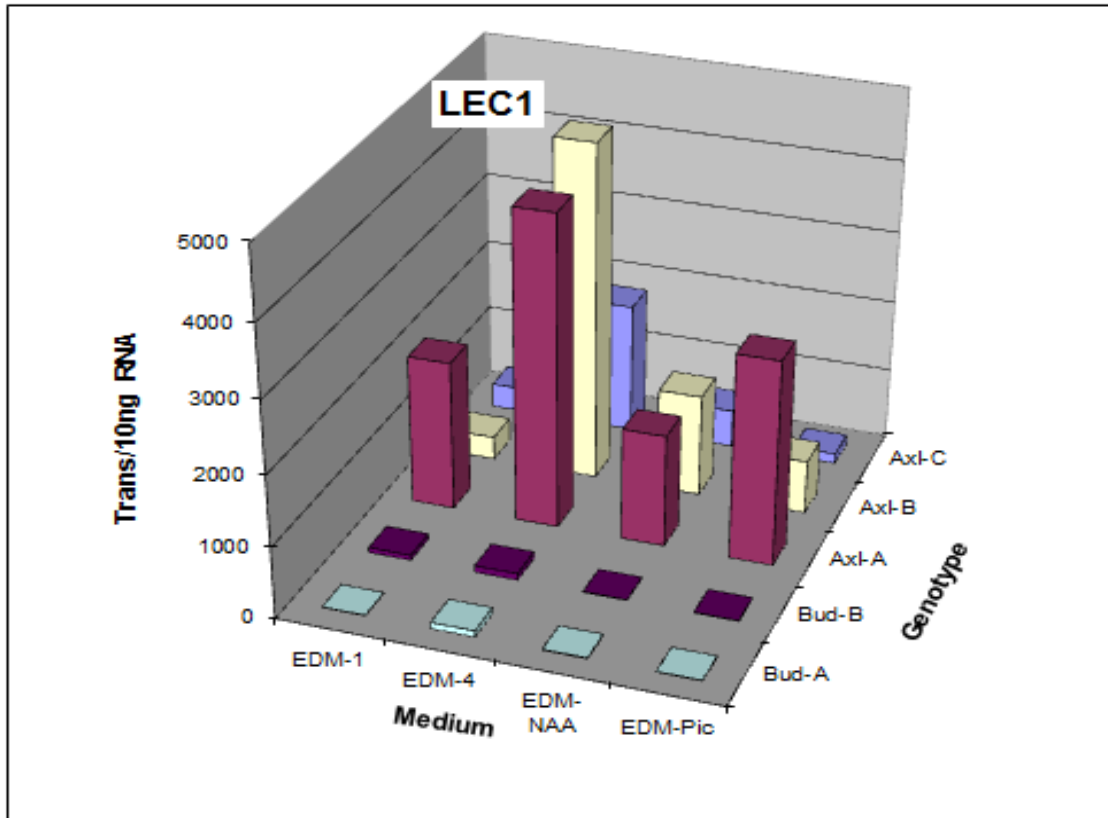

## SKN1

| Source of Variation | SS       | df | MS       | F        | P-value  | F crit   |
|---------------------|----------|----|----------|----------|----------|----------|
| Rows                | 63313.44 | 3  | 21104.48 | 0.863942 | 0.486307 | 3.490295 |
| Columns             | 80348.65 | 4  | 20087.16 | 0.822297 | 0.535508 | 3.259167 |
| Error               | 293137.3 | 12 | 24428.11 |          |          |          |
| Total               | 436799.4 | 19 |          |          |          |          |

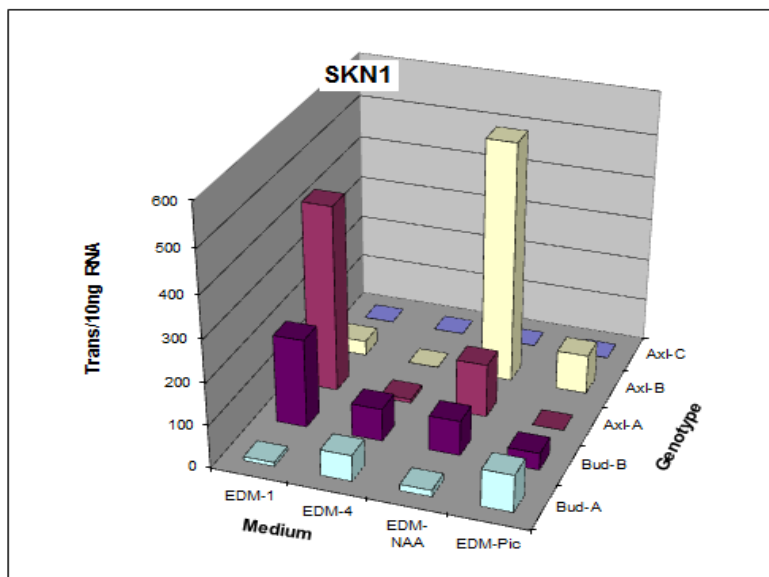

## SKN2

| Source of Variation | SS       | df | MS      | F        | P-value  | F crit   |
|---------------------|----------|----|---------|----------|----------|----------|
| Rows                | 2936550  | 3  | 978850  | 2.153164 | 0.146716 | 3.490295 |
| Columns             | 13526684 | 4  | 3381671 | 7.43862  | 0.002973 | 3.259167 |
| Error               | 5455320  | 12 | 454610  |          |          |          |
| Total               | 21918554 | 19 |         |          |          |          |

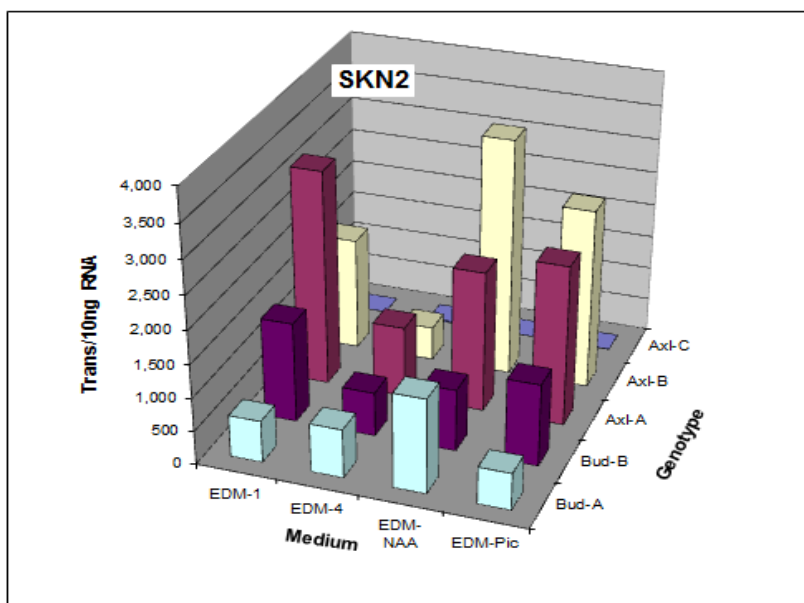

### SKN3

| Source of Variation | SS       | df | MS       | F        | P-value  | F crit   |
|---------------------|----------|----|----------|----------|----------|----------|
| Rows                | 4911286  | 3  | 1637095  | 1.016036 | 0.419658 | 3.490295 |
| Columns             | 54207330 | 4  | 13551833 | 8.410719 | 0.001791 | 3.259167 |
| Error               | 19335088 | 12 | 1611257  |          |          |          |
| Total               | 78453705 | 19 |          |          |          |          |

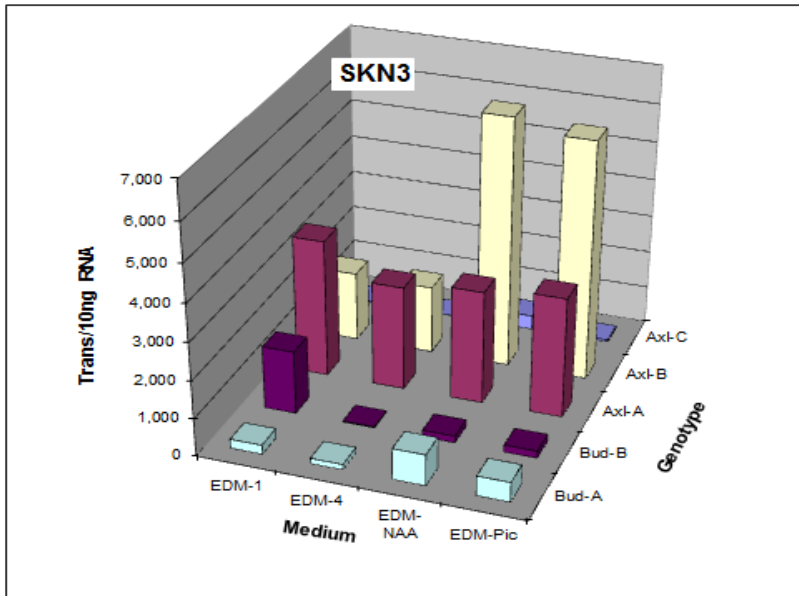

### SKN4

| Source of Variation | SS       | df | MS       | F        | P-value  | F crit   |
|---------------------|----------|----|----------|----------|----------|----------|
| Rows                | 639513.6 | 3  | 213171.2 | 0.711337 | 0.563709 | 3.490295 |
| Columns             | 3607553  | 4  | 901888.2 | 3.009537 | 0.061981 | 3.259167 |
| Error               | 3596121  | 12 | 299676.7 |          |          |          |
| Total               | 7843187  | 19 |          |          |          |          |

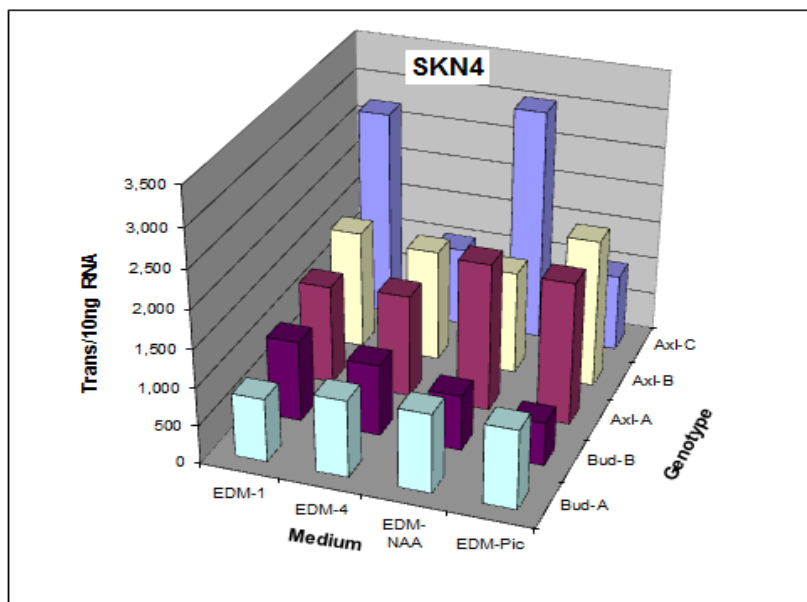

## WOX4

| Source of Variation | SS       | df | MS       | F        | P-value  | F crit   |
|---------------------|----------|----|----------|----------|----------|----------|
| Rows                | 5995064  | 3  | 1998355  | 1.246175 | 0.336325 | 3.490295 |
| Columns             | 48947408 | 4  | 12236852 | 7.630908 | 0.00268  | 3.259167 |
| Error               | 19243086 | 12 | 1603590  |          |          |          |
| Total               | 74185557 | 19 |          |          |          |          |

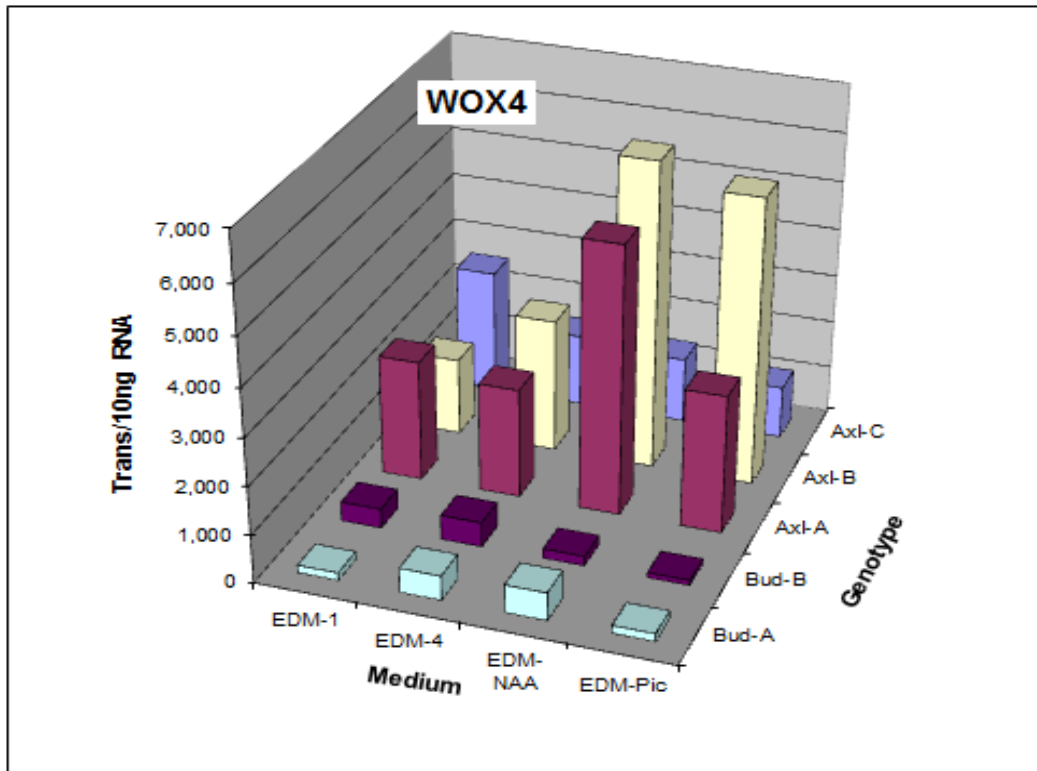

Supplement: pone.0128679.s002.pdf [file pone.0128679.s002.pdf]
