# Supplementary material for: Gene Expression Profiling of Shoot-Derived Calli from Adult Radiata Pine and Zygotic Embryo-Derived Embryonal Masses
Source: PubMed Central journal article supplement (PMC4454686; doi:10.1371/journal.pone.0128679), 2015-06-03

# Pairwise 1-way ANOVA with post-hoc Tukey HDS of shoot-derived tissues

[Link to Tukey calculator](#)

**Figure 8**  
**YLS8**

| treatments pair | Tukey HSD Q statistic | Tukey HSD p-value | Tukey HSD inference |
|-----------------|-----------------------|-------------------|---------------------|
| A vs B          | 0.9931                | 0.8999947         | insignificant       |
| A vs C          | 1.6616                | 0.7429291         | insignificant       |
| A vs D          | 1.5561                | 0.7824727         | insignificant       |
| A vs E          | 1.8046                | 0.6893107         | insignificant       |
| B vs C          | 2.6547                | 0.3705671         | insignificant       |
| B vs D          | 2.5492                | 0.4090182         | insignificant       |
| B vs E          | 2.7977                | 0.3219152         | insignificant       |
| C vs D          | 0.1055                | 0.8999947         | insignificant       |
| C vs E          | 0.1430                | 0.8999947         | insignificant       |
| D vs E          | 0.2485                | 0.8999947         | insignificant       |

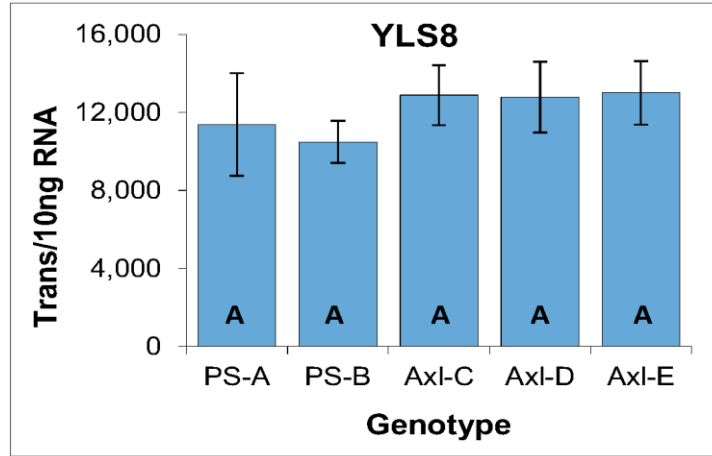

**Figure 9**  
**PCNA**

| treatments pair | Tukey HSD Q statistic | Tukey HSD p-value | Tukey HSD inference |
|-----------------|-----------------------|-------------------|---------------------|
| A vs B          | 0.0327                | 0.8999947         | insignificant       |
| A vs C          | 9.9008                | 0.0010053         | ** p<0.01           |
| A vs D          | 11.6133               | 0.0010053         | ** p<0.01           |
| A vs E          | 5.4395                | 0.0117421         | * p<0.05            |
| B vs C          | 9.8681                | 0.0010053         | ** p<0.01           |
| B vs D          | 11.5806               | 0.0010053         | ** p<0.01           |
| B vs E          | 5.4068                | 0.0122802         | * p<0.05            |
| C vs D          | 1.7126                | 0.7238090         | insignificant       |
| C vs E          | 4.4613                | 0.0441747         | * p<0.05            |
| D vs E          | 6.1738                | 0.0042907         | ** p<0.01           |

**H4**

| treatments pair | Tukey HSD Q statistic | Tukey HSD p-value | Tukey HSD inference |
|-----------------|-----------------------|-------------------|---------------------|
| A vs B          | 1.8527                | 0.6712826         | insignificant       |
| A vs C          | 6.4968                | 0.0027618         | ** p<0.01           |
| A vs D          | 7.3276                | 0.0010053         | ** p<0.01           |
| A vs E          | 3.6570                | 0.1236450         | insignificant       |
| B vs C          | 4.6441                | 0.0346156         | * p<0.05            |
| B vs D          | 5.4749                | 0.0111876         | * p<0.05            |
| B vs E          | 1.8043                | 0.6894039         | insignificant       |
| C vs D          | 0.8308                | 0.8999947         | insignificant       |
| C vs E          | 2.8398                | 0.3087464         | insignificant       |
| D vs E          | 3.6706                | 0.1216099         | insignificant       |

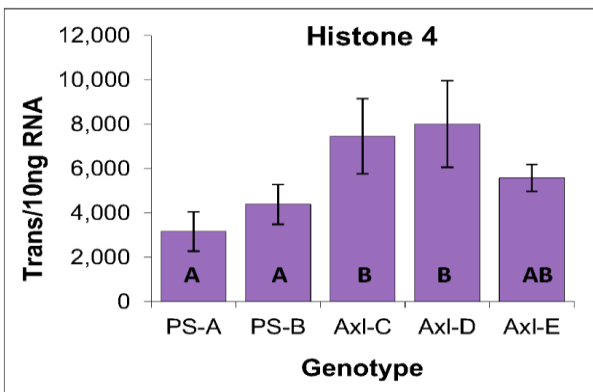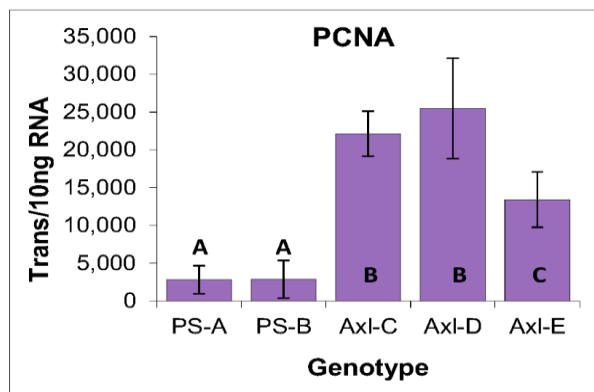

**Figure 10**  
**LEC1**

| treatments pair | Tukey HSD Q statistic | Tukey HSD p-value | Tukey HSD inference |
|-----------------|-----------------------|-------------------|---------------------|
| A vs B          | 0.0295                | 0.8999947         | insignificant       |
| A vs C          | 4.9083                | 0.0242415         | * p<0.05            |
| A vs D          | 3.2296                | 0.2036642         | insignificant       |
| A vs E          | 1.2362                | 0.8999947         | insignificant       |
| B vs C          | 4.8787                | 0.0252316         | * p<0.05            |
| B vs D          | 3.2001                | 0.2105220         | insignificant       |
| B vs E          | 1.2066                | 0.8999947         | insignificant       |
| C vs D          | 1.6786                | 0.7365265         | insignificant       |
| C vs E          | 3.6721                | 0.1213817         | insignificant       |
| D vs E          | 1.9935                | 0.6184919         | insignificant       |

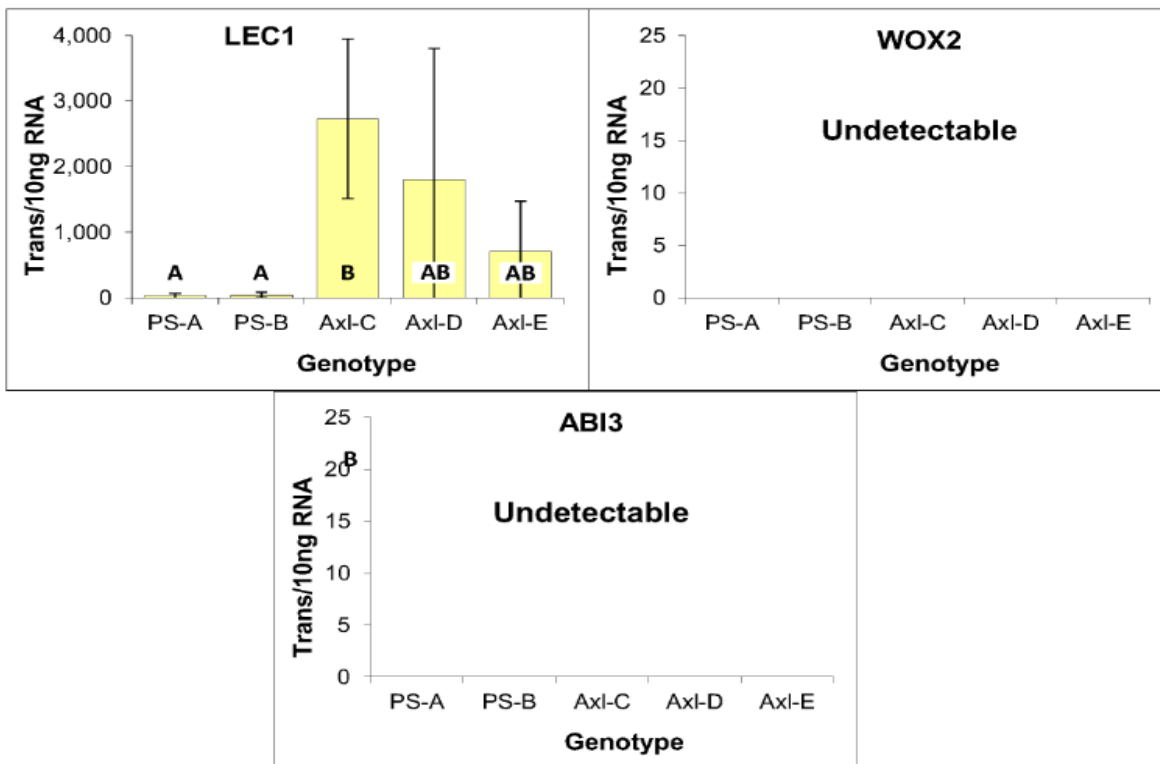

**Figure 11**

**SKN1: Note Axl-E = 0**

| treatments pair | Tukey HSD Q statistic | Tukey HSD p-value | Tukey HSD inference |
|-----------------|-----------------------|-------------------|---------------------|
| A vs B          | 0.6785                | 0.8999947         | insignificant       |
| A vs C          | 1.1656                | 0.8283879         | insignificant       |
| A vs D          | 1.4962                | 0.7037919         | insignificant       |
| B vs C          | 0.4871                | 0.8999947         | insignificant       |
| B vs D          | 0.8177                | 0.8999947         | insignificant       |
| C vs D          | 0.3305                | 0.8999947         | insignificant       |

**SKN2**

| treatments pair | Tukey HSD Q statistic | Tukey HSD p-value | Tukey HSD inference |
|-----------------|-----------------------|-------------------|---------------------|
| A vs B          | 0.6651                | 0.8999947         | insignificant       |
| A vs C          | 3.6589                | 0.1233591         | insignificant       |
| A vs D          | 3.3975                | 0.1682093         | insignificant       |
| A vs E          | 2.2091                | 0.5376466         | insignificant       |
| B vs C          | 2.9938                | 0.2633489         | insignificant       |
| B vs D          | 2.7325                | 0.3434966         | insignificant       |
| B vs E          | 2.8742                | 0.2982186         | insignificant       |
| C vs D          | 0.2613                | 0.8999947         | insignificant       |
| C vs E          | 5.8680                | 0.0065200         | ** p<0.01           |
| D vs E          | 5.6067                | 0.0093346         | ** p<0.01           |

**SKN3**

| treatments pair | Tukey HSD Q statistic | Tukey HSD p-value | Tukey HSD inference |
|-----------------|-----------------------|-------------------|---------------------|
| A vs B          | 0.1290                | 0.8999947         | insignificant       |
| A vs C          | 4.2615                | 0.0574855         | insignificant       |
| A vs D          | 5.8294                | 0.0068759         | ** p<0.01           |
| A vs E          | 0.5042                | 0.8999947         | insignificant       |
| B vs C          | 4.1325                | 0.0680054         | insignificant       |
| B vs D          | 5.7004                | 0.0082063         | ** p<0.01           |
| B vs E          | 0.6332                | 0.8999947         | insignificant       |
| C vs D          | 1.5680                | 0.7780195         | insignificant       |
| C vs E          | 4.7656                | 0.0293981         | * p<0.05            |
| D vs E          | 6.3336                | 0.0034491         | ** p<0.01           |

**SKN4**

| treatments pair | Tukey HSD Q statistic | Tukey HSD p-value | Tukey HSD inference |
|-----------------|-----------------------|-------------------|---------------------|
| A vs B          | 0.5938                | 0.8999947         | insignificant       |
| A vs C          | 2.3940                | 0.4678086         | insignificant       |
| A vs D          | 2.2698                | 0.5149064         | insignificant       |
| A vs E          | 3.6841                | 0.1196104         | insignificant       |
| B vs C          | 2.9878                | 0.2650408         | insignificant       |
| B vs D          | 2.8636                | 0.3014509         | insignificant       |
| B vs E          | 4.2779                | 0.0562588         | insignificant       |
| C vs D          | 0.1242                | 0.8999947         | insignificant       |
| C vs E          | 1.2902                | 0.8821721         | insignificant       |
| D vs E          | 1.4144                | 0.8356010         | insignificant       |

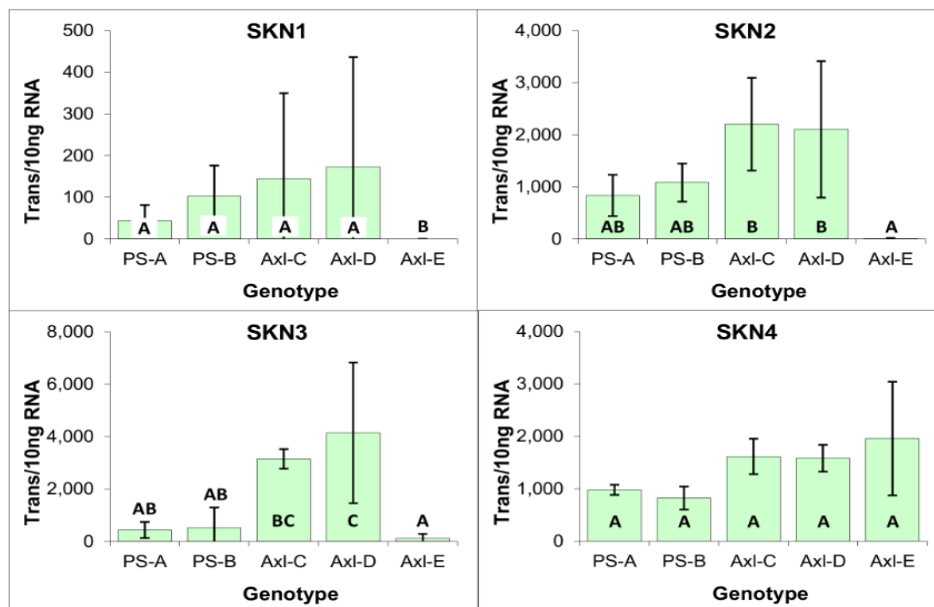

**Figure 12**  
**WOX4**

| treatments pair | Tukey HSD Q statistic | Tukey HSD p-value | Tukey HSD inference |
|-----------------|-----------------------|-------------------|---------------------|
| A vs B          | 0.0736                | 0.8999947         | insignificant       |
| A vs C          | 4.5736                | 0.0380453         | * p<0.05            |
| A vs D          | 5.9126                | 0.0061336         | ** p<0.01           |
| A vs E          | 1.9792                | 0.6238433         | insignificant       |
| B vs C          | 4.6472                | 0.0344754         | * p<0.05            |
| B vs D          | 5.9862                | 0.0055456         | ** p<0.01           |
| B vs E          | 2.0528                | 0.5962431         | insignificant       |
| C vs D          | 1.3390                | 0.8638604         | insignificant       |
| C vs E          | 2.5944                | 0.3923494         | insignificant       |
| D vs E          | 3.9334                | 0.0875581         | insignificant       |

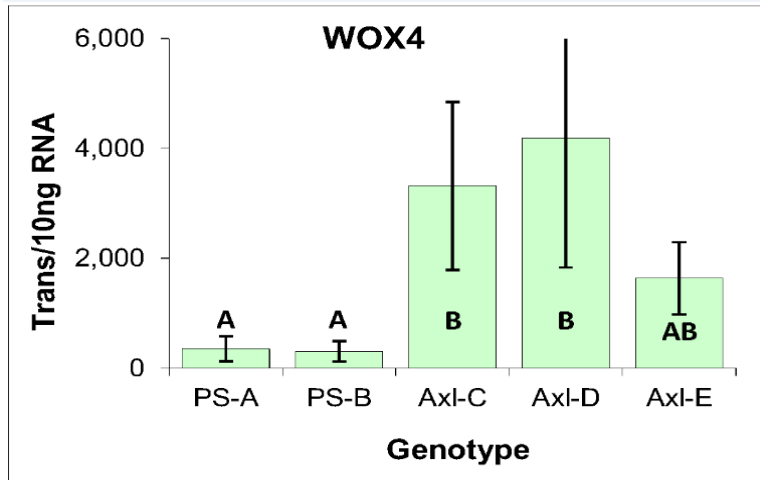

Supplement: pone.0128679.s003.pdf [file pone.0128679.s003.pdf]
