# Supplementary material for: Gene Expression Profiling of Shoot-Derived Calli from Adult Radiata Pine and Zygotic Embryo-Derived Embryonal Masses
Source: PubMed Central journal article supplement (PMC4454686; doi:10.1371/journal.pone.0128679), 2015-06-03
Supplement: pone.0128679.s004.pdf [file pone.0128679.s004.pdf]

## Primer validation via gDNA amplification

To confirm absence of polymorphic sequences that significantly disrupt primer annealing and elongation, each of the primer pairs was used to amplify 1 ng of gDNA isolated from each of the genotypes and the resulting quantities converted to copies/genome based on a haploid genome size of 22.25 pg/genome (41C/ng).

Note that the central objective was to confirm similarities in the relative quantities across the genotypes rather than to attempt to precisely determine the number of genes per genome.

A publication is currently being prepared that describes this approach in detail.  
Contact R.G. Rutledge for additional details.

| Copies per Genome    |       |           |       |       |       |       |      |       |       |       |       |
|----------------------|-------|-----------|-------|-------|-------|-------|------|-------|-------|-------|-------|
|                      | YLS8  | Histone 4 | PCNA  | LEC1  | WOX2  | ABI3  | SKN1 | SKN2  | SKN3  | SKN4  | WOX4  |
| PS-A                 | 3.61  | 1.41      | 1.16  | 1.75  | 1.33  | 0.95  | 0.95 | 1.24  | 1.21  | 0.99  | 1.09  |
| PS-B                 | 3.03  | 1.67      | 1.33  | 1.36  | 0.85  | 0.90  | 1.07 | 1.02  | 1.53  | 0.99  | 1.29  |
| Axl-C                | 2.91  | 1.84      | 1.62  | 1.89  | 1.19  | 0.65  | 1.19 | 0.92  | 0.90  | 0.87  | 1.19  |
| Axl-D                | 2.55  | 1.38      | 0.95  | 1.62  | 1.12  | 0.51  | 0.95 | 0.70  | 0.97  | 1.09  | 0.99  |
| Axl-E                | 2.80  | 1.06      | 0.92  | 1.74  | 1.03  | 0.99  | 1.02 | 0.82  | 0.89  | 0.75  | 0.85  |
| <b>Average:</b>      | 2.98  | 1.47      | 1.20  | 1.67  | 1.10  | 0.80  | 1.03 | 0.94  | 1.10  | 0.94  | 1.08  |
| <b>CV:</b>           | 13.3% | 20.3%     | 24.4% | 11.9% | 16.4% | 25.9% | 9.7% | 21.6% | 24.8% | 13.9% | 15.5% |
| <b>Amplion Size:</b> | 172   | 163       | 154   | 189   | 223   | 82    | 116  | 186   | 151   | 203   | 207   |
